# Supplementary material for: Synthesis and photocatalytic hydrogen production of a novel photocatalyst LaCO3OH
Source: Royal Society of Chemistry journal article supplement (doi:10.1039/c3ta01553j), 2013-01-01
Supplement: c3ta01553j.pdf [file c3ta01553j.pdf]

## Supplementary Information

### Synthesis and photocatalytic hydrogen production of a novel photocatalyst $\text{LaCO}_3\text{OH}$

Bao Pan, Quanhua Xie, Hemiao Wang, Jia Zhu, Yongfan Zhang, Wenyue Su\*,

Xuxu Wang

Research Institute of Photocatalysis,

Fujian Provincial Key Laboratory of Photocatalysis-State Key Laboratory Breeding Base, Fuzhou

University, Fuzhou 350002, P. R. China

Corresponding author Tel & Fax: (+86)591-83779105.

E-mail: suweny@fzu.edu.cn

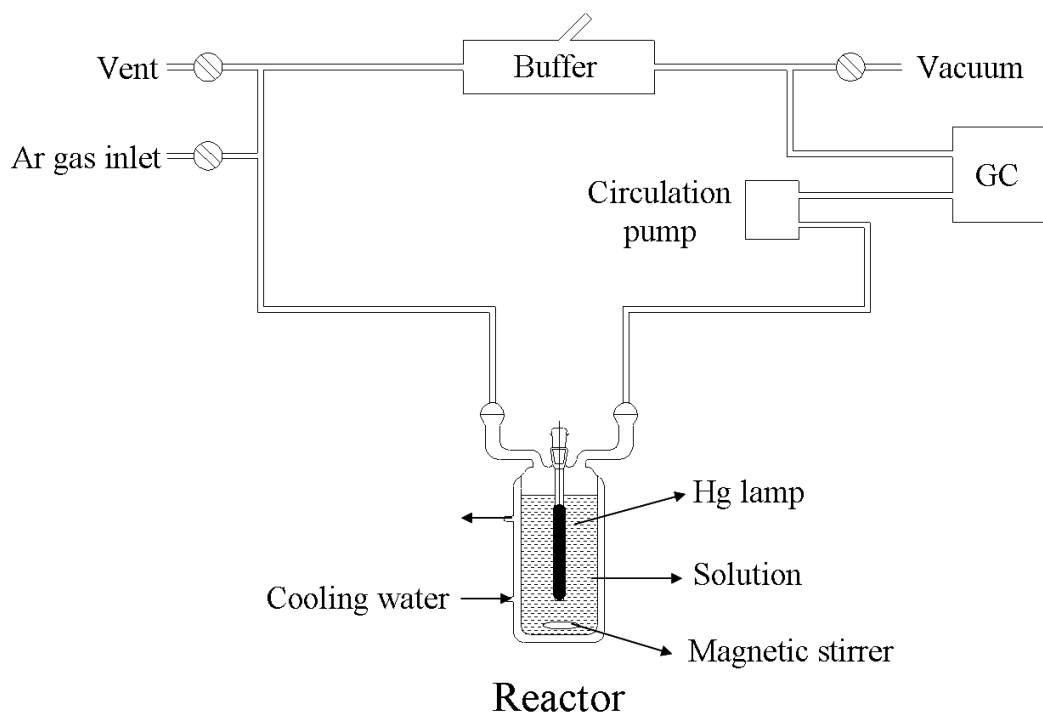

**Figure S1** Schematic diagram of the photocatalytic reaction system for H<sub>2</sub> evolution

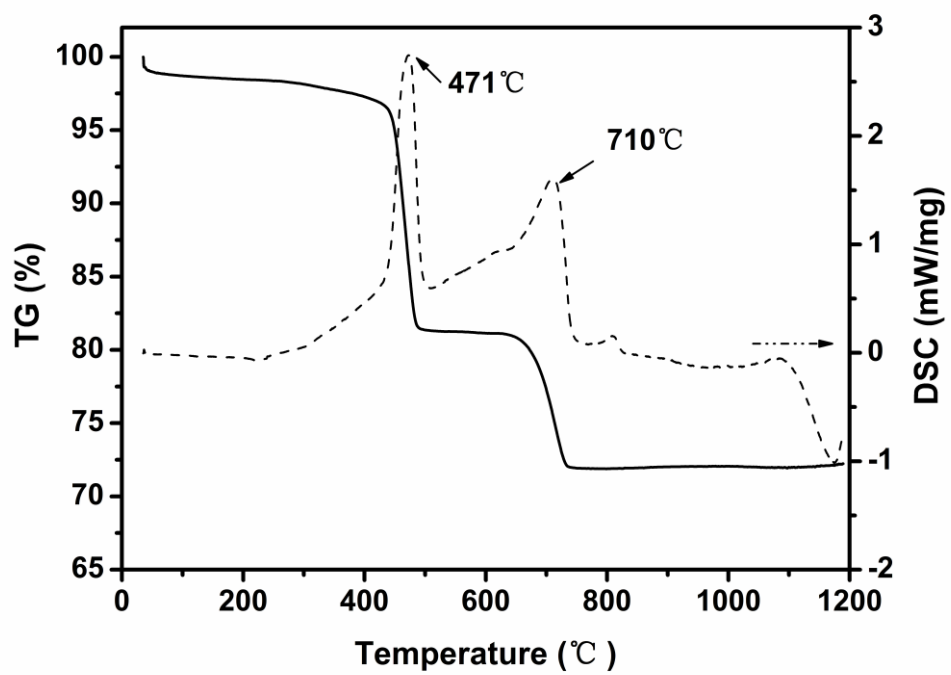

**Figure S2** The TG-DSC curves of  $\text{LaCO}_3\text{OH}$

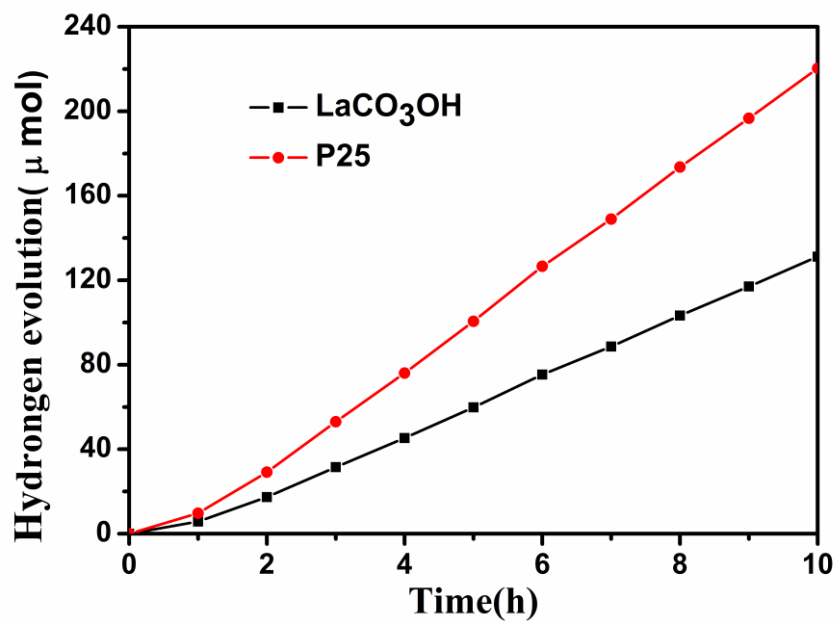

**Figure S3** Time course of photocatalytic hydrogen evolution over LaCO<sub>3</sub>OH and P25 from methanol aqueous solution

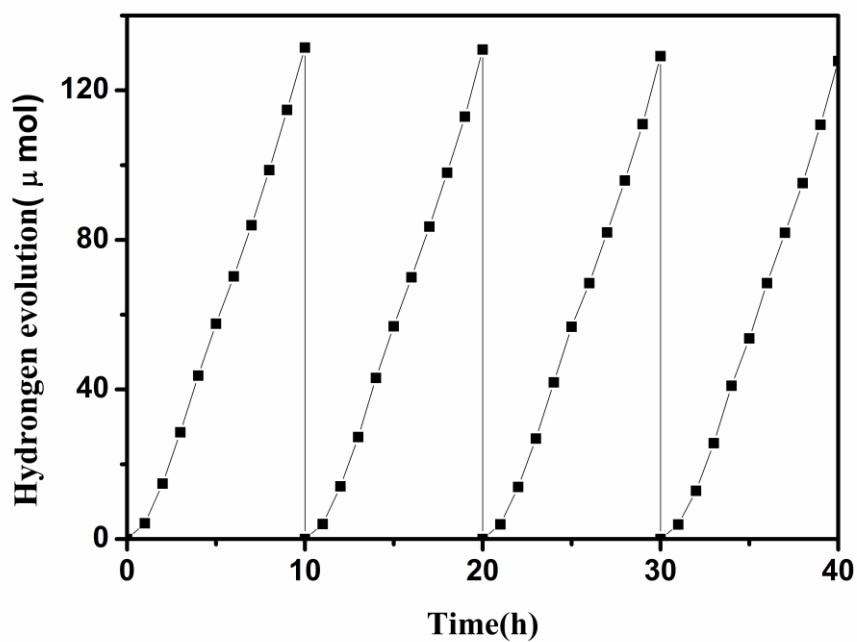

**Figure S4** Time course of photocatalytic hydrogen evolution over  $\text{LaCO}_3\text{OH}$  from methanol aqueous solution under UV light irradiation, four runs of repeated reaction.

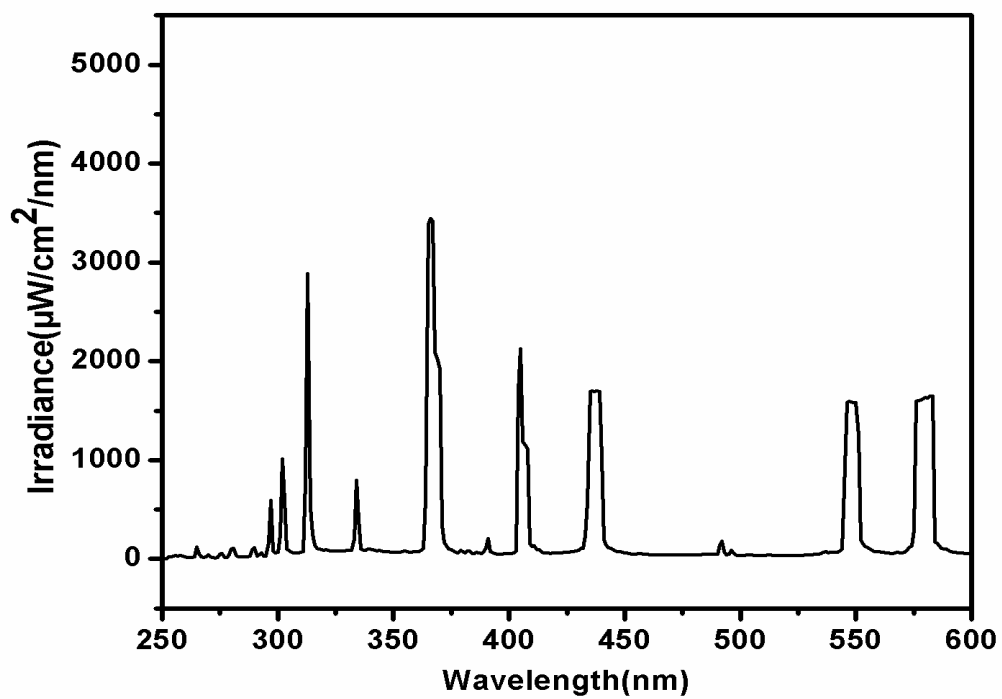

**Figure S5** Irradiance spectra of High pressure mercury lamp

**Table S1** dates about the A.Q.E of samples

|                      | number of<br>incident photons         | number of<br>reacted electrons | AQY (%) | S <sub>BET</sub> (m <sup>2</sup> /g) |
|----------------------|---------------------------------------|--------------------------------|---------|--------------------------------------|
| LaCO <sub>3</sub> OH | 2.076×10 <sup>17</sup><br>(250-308nm) | 4.572×10 <sup>15</sup>         | 2.20    | 5                                    |
| a-TiO <sub>2</sub>   | 1.685×10 <sup>18</sup><br>(250-387nm) | 1.602×10 <sup>15</sup>         | 0.095   | 122                                  |
